# Supplementary material
Source: PubMed Central journal article supplement (PMC6070147)
Supplement: NIHMS981691-supplement-1.pdf [file NIHMS981691-supplement-1.pdf]

**Cell Reports, Volume 24**

**Supplemental Information**

**Rbfox-Splicing Factors Maintain**

**Skeletal Muscle Mass**

**by Regulating Calpain3 and Proteostasis**

**Ravi K. Singh, Arseniy M. Kolonin, Marta L. Fiorotto, and Thomas A. Cooper**

A

Control, male      DKO, male  
Control, female      DKO, female

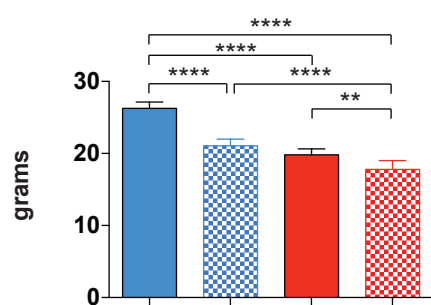

Total body weight (n=8)

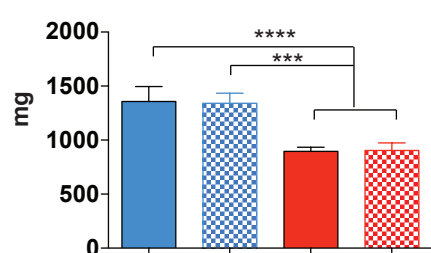

Liver weight (n=4)

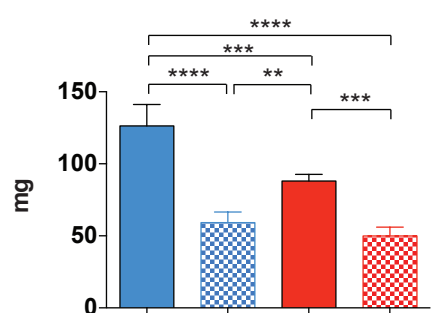

Triceps weight (n=4)

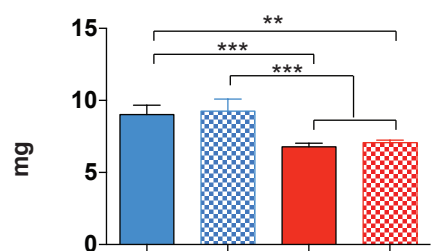

Soleus weight (n=4)

B

Single Rbfox male knockout muscle weights

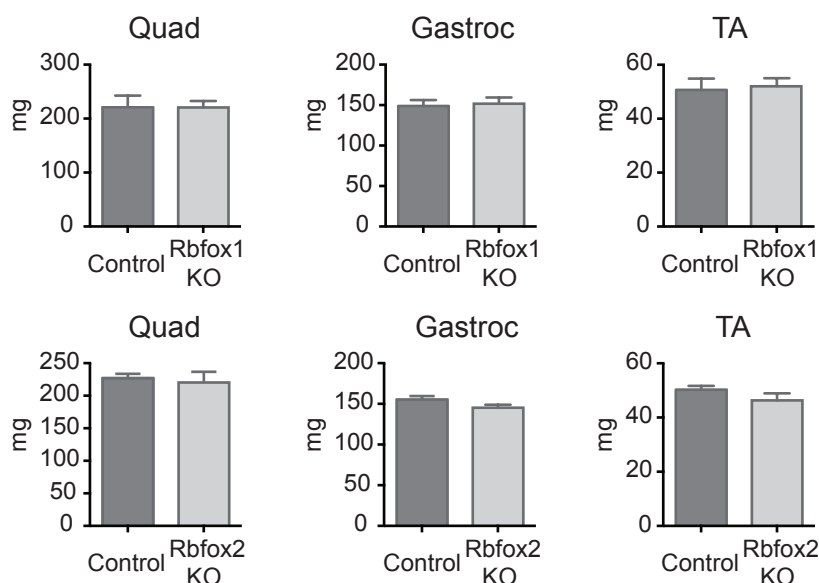

C

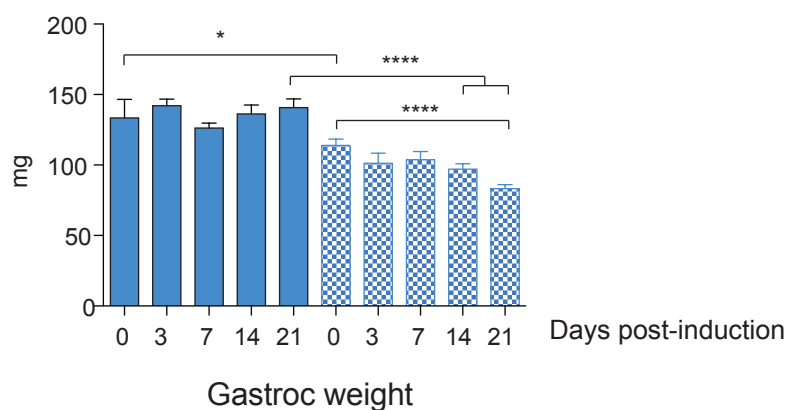

**Figure S1. Deletion of Rbfox1 and Rbfox2 in adult skeletal muscle causes loss of muscle mass, related to Figure 1.** A) Measurements of total body weight, and isolated liver, triceps and soleus muscle weights from control and DKO male and female mice (4-weeks after induction of Rbfox knock-out). B) Isolated muscle weights from control and single Rbfox1 (top) or Rbfox2 (bottom) knockout male mice. C) Isolated gastrocnemius muscle weight from uninduced and 3, 7, 14, and 21 days after starting doxycycline diet. N is  $\geq 3$  for all experiments in this figure. The columns and error bars in graphs indicate mean  $\pm$  SD. p values as indicated by asterisk were calculated by ANOVA, \* $p \leq 0.05$ , \*\* $p \leq 0.01$ , \*\*\* $p \leq 0.001$ , and \*\*\*\* $p \leq 0.0001$ .

**A**

Control, male    DKO, male

Total Z activity, (24 hours)

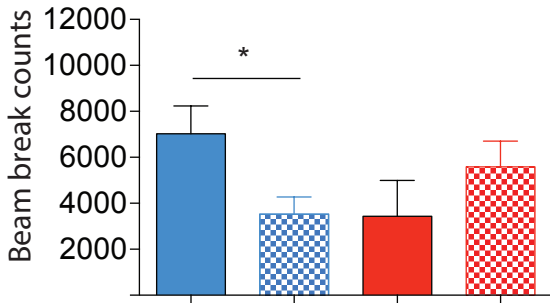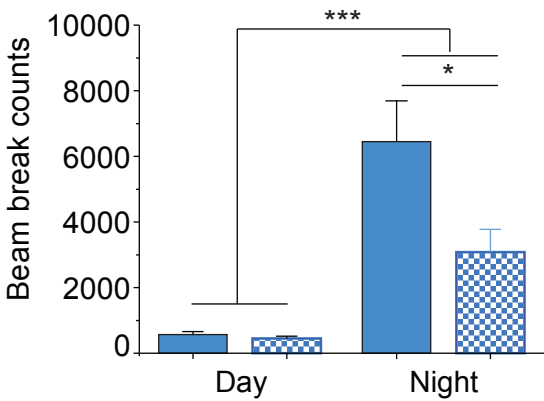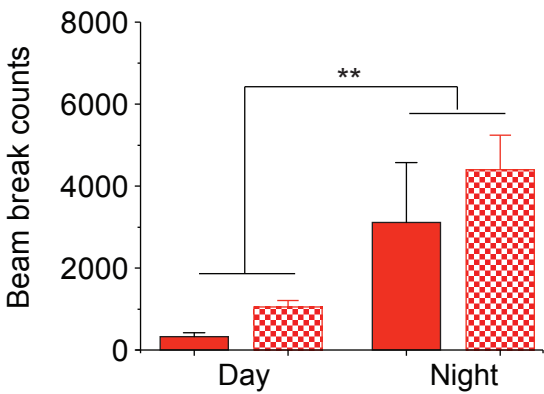

**B**

Control, female    DKO, female

Total XY activity, (24 hours)

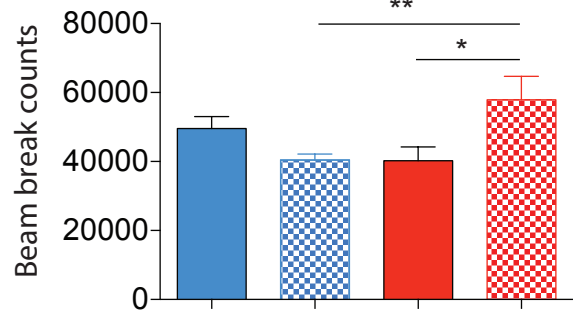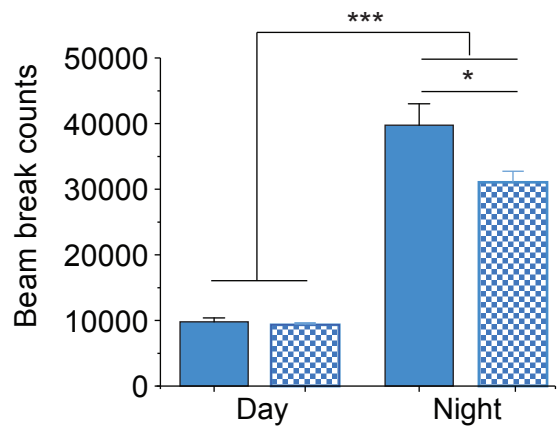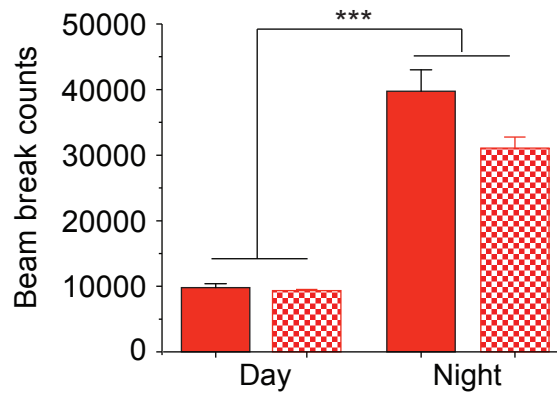

**C**

Energy expenditure

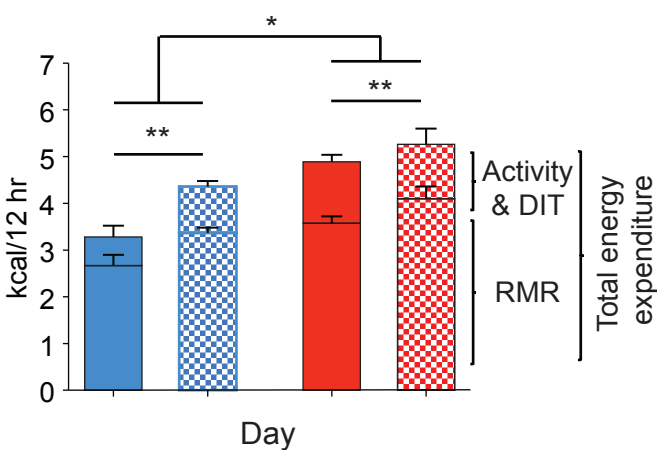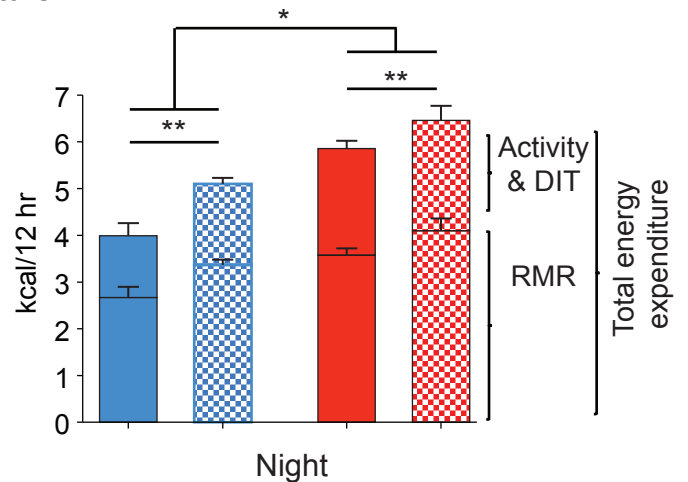

**Figure S2. Activity and energy expenditure of control and Rbfox DKO male and female mice approximately 2 weeks after knockout induction, related to Figure 2.** A-B) Average 24-hour rearing or Z-plane activity (A) and horizontal-plane activity (B) in male and female control and Rbfox DKO animals (n=5 for male, n $\geq$ 3 for female). Activity data in A and B was divided into 12-hour day (rest period, 6AM to 6PM) and night (active period, 6PM to 6AM) for male (middle panels) and female (bottom panels). For the analysis of effects of time of day; we used a repeated measure ANOVA with time of day as the repeated measure for each mouse. C) Energy expenditure (adjusted for lean mass) from control and DKO mice for day (left panel) and night (right panel) are indicated (n=5 for male, n $\geq$ 3 for female). Abbreviation: RMR - resting metabolic rate, DIT- diet induced thermogenesis. Activity and DIT is not significantly different between genotype or gender. The columns and error bars in graphs indicate means  $\pm$  SE. p values as indicated by Asterisk were calculated by ANOVA, \*p  $\leq$  0.05, \*\*p  $\leq$  0.01, \*\*\*p  $\leq$  0.001.



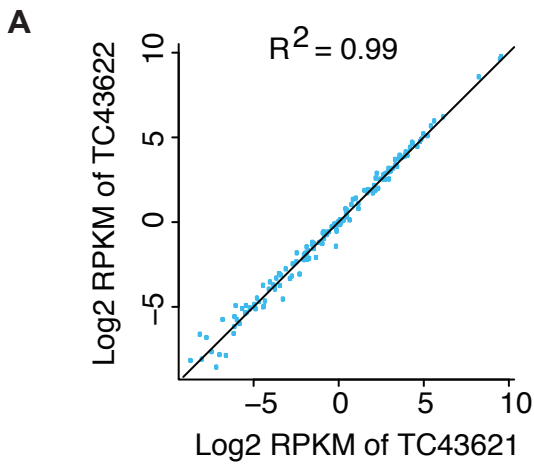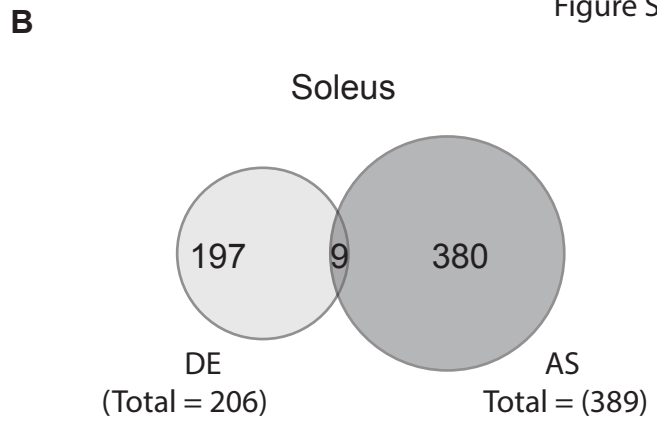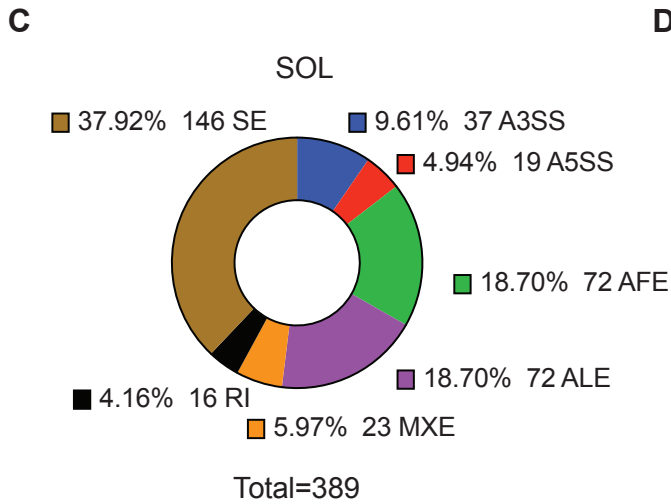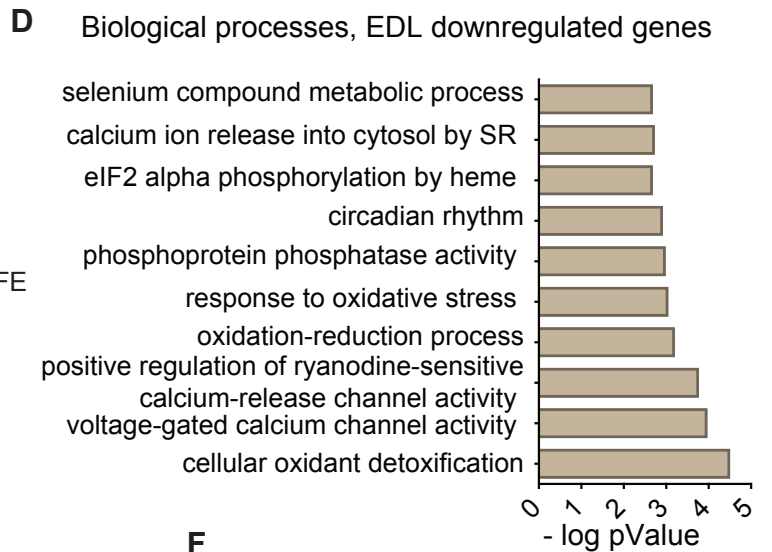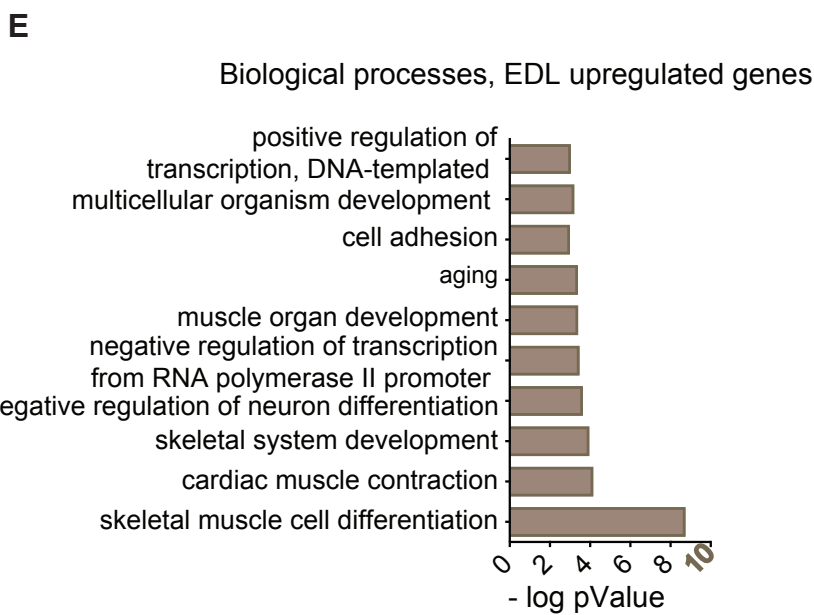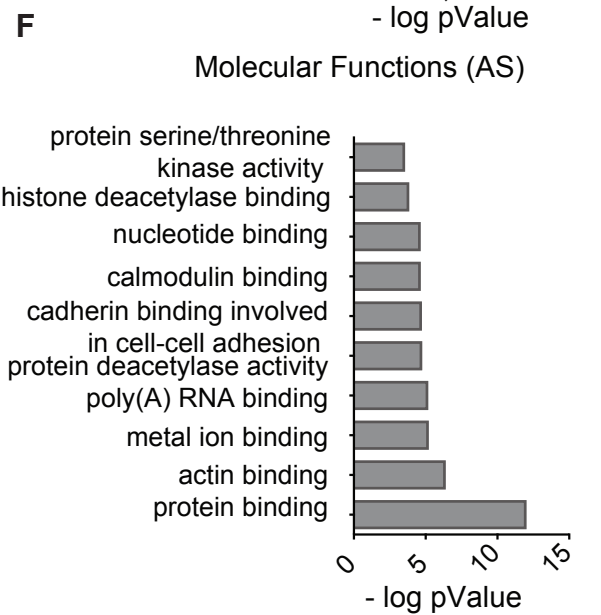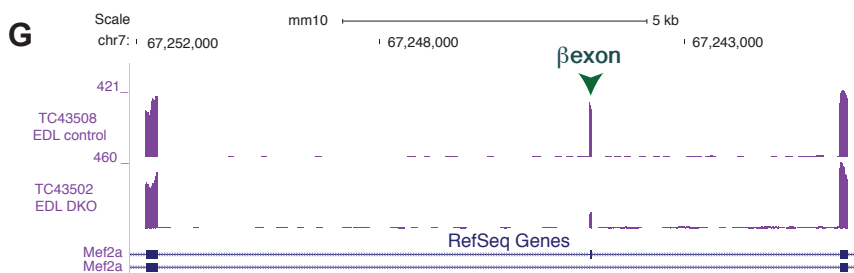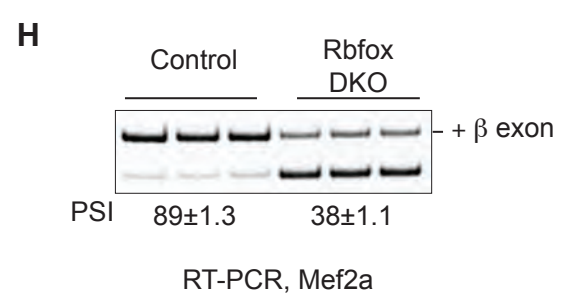

**Figure S3. Rbfox knockout in skeletal muscle causes wide-spread transcriptome changes, related to Figure 3.** A) Gene expression from two biological replicates was compared with each other. B) Venn diagram showing differential gene expression (DE) and alternative splicing (AS) changes in Rbfox knockout soleus muscles when compared to control animals at 2 weeks after knockout induction. C) Donut chart showing description of transcriptome changes in soleus muscle. Abbreviation: SE- Cassette exons, A3SS- alternative 3' splice site, A5SS - alternative 5' splice site, AFE- alternative first exon, ALE- alternative last exon, MXE - mutually exclusive exons, RI - retained intron. D-F) DAVID GO analysis to identify biological processes that are enriched for genes that are downregulation (D) or upregulation (E), and molecular functions (F) that are enriched in transcripts that are alternatively spliced in EDL muscles after Rbfox knockout. G) RNA-seq tracks showing Mef2a in control and Rbfox DKO muscles. Inclusion of  $\beta$  exon is dependent on Rbfox proteins. H) RT-PCR showing reduced PSI for Mef2a  $\beta$  exon in DKO muscle when compared to control muscle.

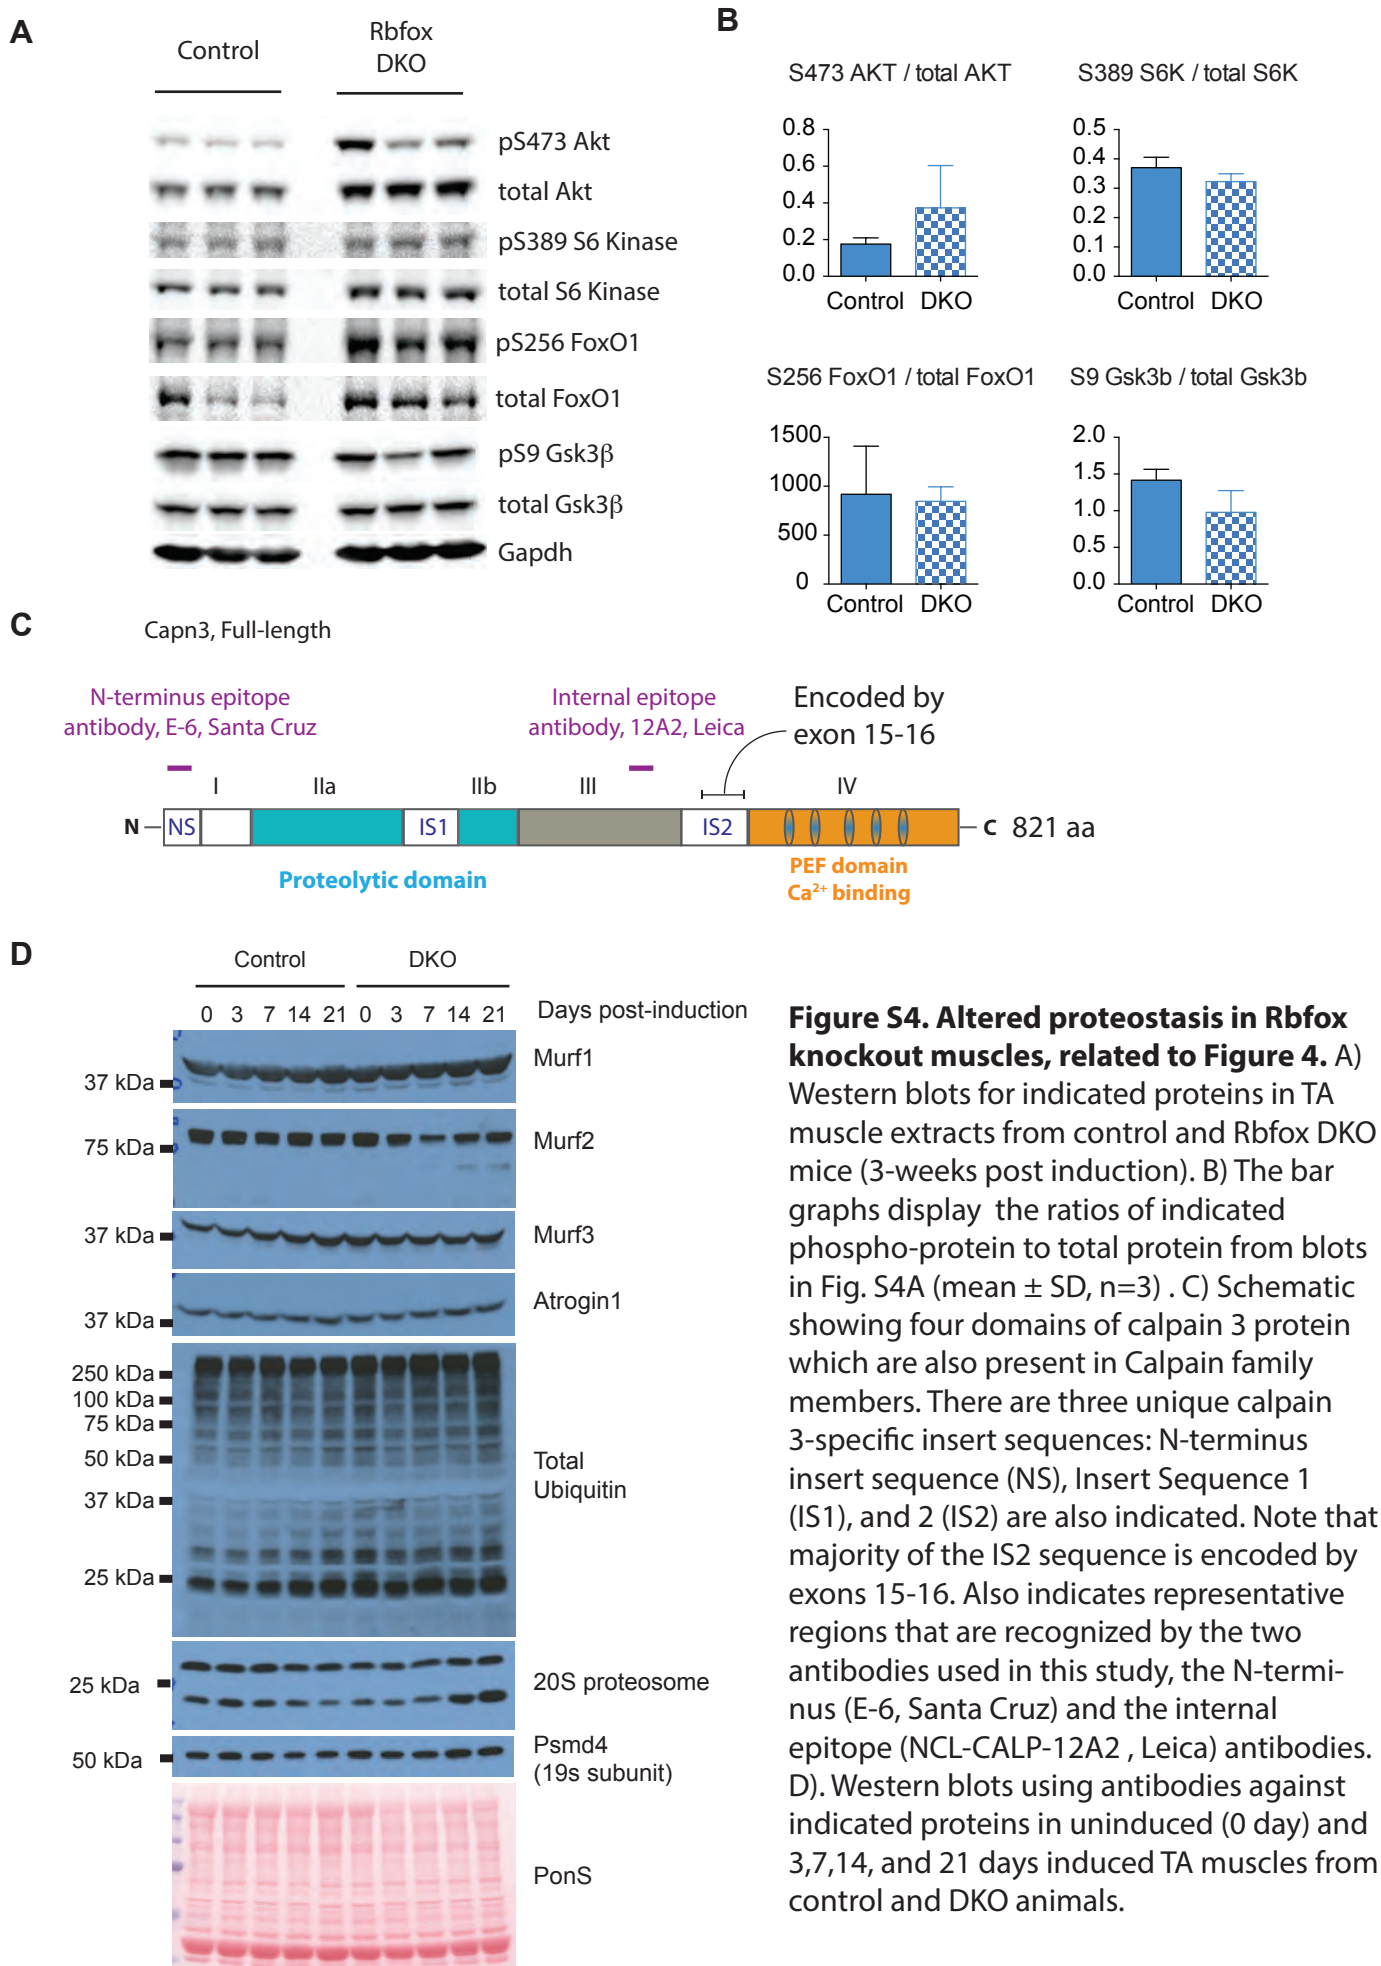

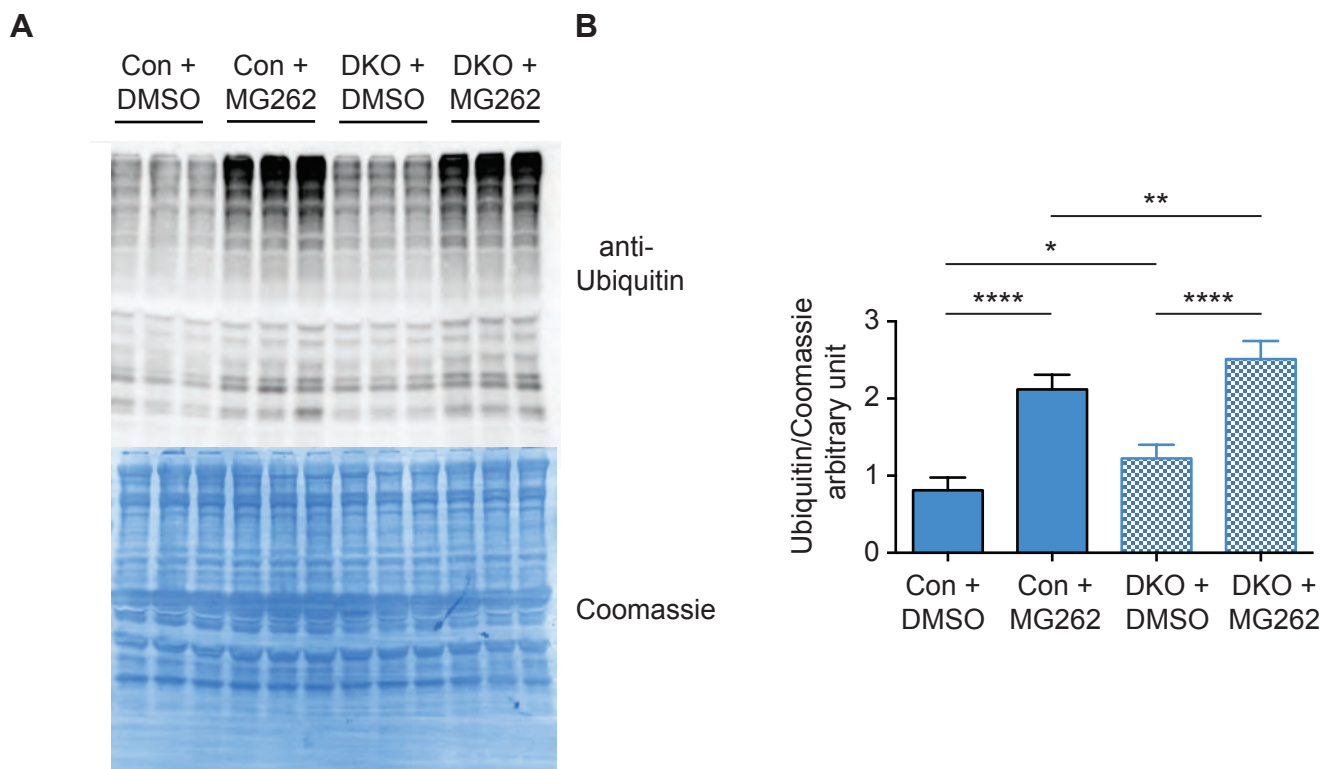

**Figure S5. Increased ubiquitinated proteins in Rbfox DKO muscles, related to Figure 5.**

A) Western blot to detect ubiquitinated proteins from TA muscles from control and DKO mice treated with DMSO or MG262 (5 $\mu$ mol/kg) ( $n \geq 3$ ). B) Signals from ubiquitinated proteins were normalized to coomassie signal from each lane in the same blot. The columns and error bars in graphs indicate normalized mean intensity of ubiquitinated proteins  $\pm$  SD.  $p$  values as indicated by asterisk were calculated by ANOVA, \* $p \leq 0.05$ , \*\* $p \leq 0.01$ , and \*\*\*\* $p \leq 0.0001$ .

## **Supplemental Information**

### **Supplemental experimental procedures**

#### *Mouse muscle strength and activity assays*

Treadmill assays were performed on the Exer 3/6 six treadmill (Columbus Instruments, OH) at a starting speed of 6 meters/min for first two minutes (10 degree incline) increased 2 meters/min every two minutes until exhaustion. The speed and time were used to measure the total distance run by mice in each group. Grip strength was performed using a 1027SM grip strength meter with single sensor (Columbus Instruments, OH). Forelimb and all limb grip strength used 5 measurements of grams of force produced in the t-pk mode and average values were calculated. For the hang test, soft padding was added in cardboard box (14 in x14 in x14 in), a wire grid was placed on top of the box and the mouse was placed upside down; the time until the mouse could no longer hold onto the wire was recorded for each mouse.

#### *Histological analyses*

For histology of muscles, skin and fascia was removed and whole limbs were fixed overnight in 10% buffered formalin. Muscles were isolated and processed for paraffin embedding, routine sectioning, hematoxylin and eosin staining.

#### *Food Intake, Energy Expenditure, Activity*

The Comprehensive Laboratory Animal Monitoring System (Columbus Instruments, OH) was used to measure food intake, activity, and energy expenditure. Mice were adapted to the cages at 9 days after starting the dox diet and various measurements were taken from day 13 to day 17 to quantify energy balance, food intake, and activity as previously described (Crossland et al., 2017).

#### *Glucose Tolerance Test*

The glucose tolerance test was performed by the Mouse Metabolism Core at Baylor College of Medicine. Two weeks after starting the dox diet, mice were starved for 6 hours, and then glucose (1.5 g/kg of body weight) was injected intraperitoneally. Blood was drawn at the

indicated times after injection and glucose and insulin levels were measured as described before (Saha et al., 2010).

### *Western blotting*

Frozen muscles were homogenized with Bullet Blender 24 (Next Advance, Averill Park, NY) using zirconium oxide beads in buffer containing 50 mM Tris–HCL, pH 7.5, 100mM NaCl, 10 mM EDTA, 10 mM EGTA, 10% glycerol, 1% NP40, 50 mM NaF, 10uM MG132, 1mM PMSF, 0.5% Sodium deoxycholate, 1% SDS, protease and phosphatase inhibitor (Roche Diagnostics, Indianapolis, IN). Relative protein amount was quantified using the Pierce BCA Protein Assay Kit and equivalent amount of proteins were loaded on SDS-PAGE gels. Separated proteins were transferred to PVDF membrane. Membranes were stained with Ponceau S to assess even transfer and subsequently probed with specific primary antibodies. Secondary antibodies were conjugated to HRP and blots were imaged with ChemiDoc XRS+ (Bio-Rad, Hercules, CA) or standard autoradiography film. For quantification of western blot, images from ChemiDoc were exported for analysis and analyzed by Carestream software (Rochester, NY).

### *Inhibition of proteasome experiment*

Seven-week-old Rbfox control and DKO mice were put on dox diet, and 4-days later, mice were injected intraperitoneally (IP) with 60% DMSO or 5 umol/kg MG262 (ApexBio, MA). TA muscle was harvested 16 hours after the injection for western blotting with anti-ubiquitin [P4D1] antibody (UBPBio, CO). The same Western blots were stained with the Coomassie for normalization of ubiquitin signal by total protein signal by densitometry to calculate relative levels of ubiquitinated proteins in each group.

### **Resource Table:**

| <b>REAGENT or RESOURCE</b>   | <b>SOURCE</b>          | <b>IDENTIFIER</b> |
|------------------------------|------------------------|-------------------|
| <b>Antibodies</b>            |                        |                   |
| Anti- Rbfox1                 | Cooper lab             |                   |
| Anti-Rbfox2                  | Cooper lab             |                   |
| Anti-Capn3 (E-6)             | Santa Cruz             | sc-365277         |
| Anti-Calpain (12A2)          | Leica Microsystems Inc | CALP12A2          |
| Anti-Calpastatin (H-300)     | Santa Cruz             | sc-20779          |
| Anti-Trim63 (MuRF1) antibody | Proteintech Group, Inc | 55456-1-AP        |

|                                                          |                                 |          |
|----------------------------------------------------------|---------------------------------|----------|
| Anti-MuRF2 antibody                                      | Abcam                           | ab4387   |
| Anti-MuRF3 (N-19) Antibody                               | Santa Cruz                      | sc-50252 |
| Anti-phospho Gsk3 $\beta$ (S9)                           | Cell Signaling Technology, Inc. | 5558     |
| Anti-phospho S6 Kinase (S389)                            | Cell Signaling Technology, Inc. | 9234     |
| Anti-S6 Kinase                                           | Cell Signaling Technology, Inc. | 9202     |
| Anti-phospho FoxO1                                       | Cell Signaling Technology, Inc. | 9461     |
| Anti-FoxO1                                               | Cell Signaling Technology, Inc. | 2880     |
| Anti-phospho AKT (S473)                                  | Cell Signaling Technology, Inc. | 4060     |
| Anti-Akt (pan)                                           | Cell Signaling Technology, Inc. | 4691     |
| Anti-phospho Gsk3 $\beta$                                | BD Biosciences                  | 610202   |
| Anti-gapdh                                               | Cell Signaling Technology, Inc. | 5174     |
| Anti-p62                                                 | Progen Biotechnik               | GP62-C   |
| Anti-LC3b                                                | Cell Signaling Technology, Inc. | 2775     |
| Anti-Anti-Spectrin alpha chain (nonerythroid), clone AA6 | EMD Millipore                   | MAB1622  |
| Anti-Ubiquitin (P4D1)                                    | UPBio                           | Y3012    |
| Anti-Psm4                                                | Abcam                           | ab137109 |
| Anti-20S Proteasome                                      | UBPBio                          | Y2011    |
| Anti-Fbx32 antibody (Atrogin 1)-Conjugated to HRP        | Abcam                           | ab198958 |

| <b>Chemicals, Peptides, and Recombinant Proteins</b> |                    |                |
|------------------------------------------------------|--------------------|----------------|
| Colchicine                                           | Sigma Aldrich      | C9754          |
| Puromycin . 2HCl                                     | Enzo Life Sciences | BML-GR312-0050 |

### Supplemental References

Crossland, R.F., Balasa, A., Ramakrishnan, R., Mahadevan, S.K., Fiorotto, M.L., and Van den Veyver, I.B. (2017). Chronic Maternal Low-Protein Diet in Mice Affects Anxiety, Night-Time Energy Expenditure and Sleep Patterns, but Not Circadian Rhythm in Male Offspring. *PLoS One* 12, e0170127.

Saha, P.K., Reddy, V.T., Konopleva, M., Andreeff, M., and Chan, L. (2010). The triterpenoid 2-cyano-3,12-dioxooleana-1,9-dien-28-oic-acid methyl ester has potent anti-diabetic effects in diet-induced diabetic mice and *Lepr(db/db)* mice. *J Biol Chem* 285, 40581-40592.
